# Supplementary material for: Safety and Efficacy of Empagliflozin and Diuretic Use in Patients with Heart Failure and Preserved Ejection Fraction: A Post Hoc Analysis of the EMPEROR-Preserved Trial
Source: PubMed Central journal article supplement — JAMA Cardiol. 2023 May 24;8(7):640–9. doi: 10.1001/jamacardio.2023.1090 (PMC10209829; doi:10.1001/jamacardio.2023.1090), 2023-05-24

## Supplemental Online Content

Butler J, Usman MS, Filippatos G, et al. Safety and efficacy of empagliflozin and diuretic use in patients with heart failure and preserved ejection fraction: a post hoc analysis of the EMPEROR-Preserved trial. *JAMA Cardiol*. Published online May 24, 2023. doi:10.1001/jamacardio.2023.1090

**eTable 1.** Characteristics of patients in the empagliflozin and placebo groups in patients with and without diuretic use at baseline

**eTable 2.** Change from baseline in estimated glomerular filtration rate slope and physiologic variables (at 52 weeks) in the placebo arm, according to baseline diuretic status and dose

**eTable 3.** Effect of empagliflozin versus placebo on eGFR slope and physiologic outcomes (at 52 weeks), according to baseline diuretic therapy

**eTable 4.** Adverse effects in the empagliflozin versus placebo arm according to baseline diuretic use

**eTable 5.** Frequency of each preferred term grouped under 'volume depletion'

**eFigure 1.** Event rates for primary and secondary outcomes in placebo arm according to baseline diuretic status

**eFigure 2.** Change in Kansas City Cardiomyopathy Questionnaire subdomain scores KCCQ-CSS (A), KCCQ-TSS (B) and KCCQ-OSS (C) in the placebo arm according to baseline diuretic status and dose

This supplemental material has been provided by the authors to give readers additional information about their work.

**eTable 1.** Characteristics of patients in the empagliflozin and placebo groups in patients with and without diuretic use at baseline

|                                           | Diuretics Not Used (n=1179) |                    |         | Diuretics Used (n=4636)   |                     |         | Empa<br>(diuretics)<br>vs Empa<br>(no<br>diuretics) | Pla<br>(diuretics)<br>vs Pla (no<br>diuretics) |
|-------------------------------------------|-----------------------------|--------------------|---------|---------------------------|---------------------|---------|-----------------------------------------------------|------------------------------------------------|
|                                           | Empagliflozin<br>(n=590)    | Placebo<br>(n=589) | p-value | Empagliflozin<br>(n=2319) | Placebo<br>(n=2317) | p-value |                                                     |                                                |
| <i>Demographics and vitals</i>            |                             |                    |         |                           |                     |         |                                                     |                                                |
| Age, y; mean (SD)                         | 70.9 (9.5)                  | 70.9 (9.3)         | 0.9898  | 72.1 (9.2)                | 72.2 (9.6)          | 0.6394  | 0.0057                                              | 0.0028                                         |
| Female; n (%)                             | 231 (39.2)                  | 221<br>(37.5)      | 0.5646  | 1066 (46.0)               | 1076<br>(46.4)      | 0.7476  | 0.0029                                              | <0.001                                         |
| Race; n (%)                               |                             |                    |         |                           |                     |         |                                                     |                                                |
| White                                     | 415 (70.3)                  | 388<br>(65.9)      | 0.0628  | 1787 (77.1)               | 1791<br>(77.3)      | 0.4668  | <0.001                                              | <0.001                                         |
| Asian                                     | 113 (19.2)                  | 134<br>(22.8)      |         | 297 (12.8)                | 273 (11.8)          |         |                                                     |                                                |
| Black or African American                 | 20 (3.4)                    | 11 (1.9)           |         | 112 (4.8)                 | 110 (4.7)           |         |                                                     |                                                |
| Other                                     | 42 (7.1)                    | 56 (9.5)           |         | 122 (5.3)                 | 142 (6.1)           |         |                                                     |                                                |
| Region; n (%)                             |                             |                    |         |                           |                     |         |                                                     |                                                |
| Asia                                      | 99 (16.8)                   | 119<br>(20.2)      | 0.1838  | 241 (10.4)                | 220 (9.5)           | 0.6972  | <0.001                                              | <0.001                                         |
| Europe                                    | 215 (36.4)                  | 187<br>(31.7)      |         | 1065 (45.9)               | 1096<br>(47.3)      |         |                                                     |                                                |
| North America                             | 64 (10.8)                   | 51 (8.7)           |         | 280 (12.1)                | 293 (12.6)          |         |                                                     |                                                |
| Latin America                             | 182 (30.8)                  | 201<br>(34.1)      |         | 575 (24.8)                | 551 (23.8)          |         |                                                     |                                                |
| Heart rate, bpm; mean (SD)                | 68.7 (11.2)                 | 69.5<br>(11.6)     | 0.2710  | 70.8 (12.2)               | 70.5 (11.8)         | 0.3822  | 0.0002                                              | 0.0572                                         |
| Systolic blood pressure, mmHg; mean (SD)  | 132.2 (15.0)                | 132.5<br>(14.8)    | 0.7574  | 131.6 (15.8)              | 131.7<br>(15.9)     | 0.8513  | 0.3959                                              | 0.2739                                         |
| Diastolic blood pressure, mmHg; mean (SD) | 76.9 (10.4)                 | 76.8<br>(10.6)     | 0.8619  | 75.4 (10.6)               | 75.5 (10.5)         | 0.8658  | 0.0027                                              | 0.0071                                         |

|                                                       |               |               |                     |               |               |                     |        |        |
|-------------------------------------------------------|---------------|---------------|---------------------|---------------|---------------|---------------------|--------|--------|
| Weight, kg; mean (SD)                                 | 76.86 (17.73) | 77.03 (17.74) | 0.8756              | 82.93 (19.59) | 82.86 (19.74) | 0.9104              | <0.001 | <0.001 |
| Body mass index, kg/m <sup>2</sup> ; mean (SD)        | 27.90 (5.14)  | 27.98 (5.26)  | 0.7815              | 30.22 (5.87)  | 30.36 (6.00)  | 0.4199              | <0.001 | <0.001 |
| <i>Medical history, n (%)</i>                         |               |               |                     |               |               |                     |        |        |
| Atrial fibrillation                                   | 221 (37.5)    | 240 (40.7)    | 0.2472              | 1260 (54.3)   | 1218 (52.6)   | 0.2400              | <0.001 | <0.001 |
| Hypertension                                          | 516 (87.5)    | 501 (85.1)    | 0.2317              | 2124 (91.6)   | 2125 (91.7)   | 0.8804              | 0.0020 | <0.001 |
| CKD                                                   | 241 (40.8)    | 243 (41.3)    | 0.8864              | 1328 (57.3)   | 1291 (55.7)   | 0.3108              | <0.001 | <0.001 |
| BMI ≥30, Kg/m <sup>2</sup>                            | 190 (32.2)    | 187 (31.7)    | 0.8671              | 1110 (47.9)   | 1124 (48.5)   | 0.6601              | <0.001 | <0.001 |
| Diabetes mellitus                                     | 224 (38.0)    | 263 (44.7)    | 0.0197              | 1208 (52.1)   | 1171 (50.5)   | 0.2905              | <0.001 | 0.0107 |
| <i>Laboratory measurements</i>                        |               |               |                     |               |               |                     |        |        |
| Estimated GFR, mL·min/1.73 m <sup>-2</sup>            | 66.8 (18.3)   | 66.3 (19.0)   | 0.6014              | 59.0 (19.8)   | 59.3 (19.9)   | 0.6245              | <0.001 | <0.001 |
| Estimated GFR <60 mL·min/1.73 m <sup>-2</sup> , n (%) | 217 (36.8)    | 221 (37.5)    | 0.7922              | 1244 (53.6)   | 1216 (52.5)   | 0.4370              | <0.001 | <0.001 |
| Creatinine, μmol/L                                    | 95.3 (28.1)   | 96.8 (30.6)   | 0.3922              | 107.2 (36.8)  | 106.2 (35.6)  | 0.3605              | <0.001 | <0.001 |
| Hematocrit, %                                         | 41.6 (4.6)    | 41.8 (4.8)    | 0.3887              | 40.7 (4.7)    | 40.7 (4.8)    | 0.8930              | <0.001 | <0.001 |
| <i>Heart failure history</i>                          |               |               |                     |               |               |                     |        |        |
| NYHA functional classification; n (%)                 |               |               |                     |               |               |                     |        |        |
| II                                                    | 531 (90.0)    | 530 (90.0)    | 0.3797 <sup>#</sup> | 1837 (79.2)   | 1865 (80.5)   | 0.7546 <sup>#</sup> | <0.001 | <0.001 |
| III                                                   | 56 (9.5)      | 59 (10.0)     |                     | 473 (20.4)    | 443 (19.1)    |                     |        |        |
| IV                                                    | 1 (0.2)       | 0             |                     | 8 (0.3)       | 8 (0.3)       |                     |        |        |
| Principal cause of heart failure; n (%)               |               |               |                     |               |               |                     |        |        |
| Ischemic                                              | 259 (43.9)    | 247 (41.9)    | 0.4800              | 797 (34.4)    | 755 (32.6)    | 0.1983              | <0.001 | <0.001 |
| Nonischemic                                           | 330 (55.9)    | 342 (58.1)    |                     | 1522 (65.6)   | 1562 (67.4)   |                     |        |        |

|                                                                                                                                                        |                    |                    |        |                    |                    |        |        |        |
|--------------------------------------------------------------------------------------------------------------------------------------------------------|--------------------|--------------------|--------|--------------------|--------------------|--------|--------|--------|
| NT-proBNP, pg/mL; mean (SD)                                                                                                                            | 1090.0<br>(1666.8) | 1107.3<br>(1319.9) | 0.3546 | 1536.7<br>(1822.3) | 1573.2<br>(2284.4) | 0.5757 | <0.001 | <0.001 |
| KCCQ clinical symptom score; mean (SD)                                                                                                                 | 77.6 (18.4)        | 77.8<br>(19.4)     | 0.8659 | 68.4 (21.9)        | 68.7 (20.8)        | 0.5725 | <0.001 | <0.001 |
| Left ventricular ejection fraction, %; mean (SD)                                                                                                       | 54.4 (9.2)         | 54.2 (9.1)         | 0.7851 | 54.3 (8.7)         | 54.3 (8.7)         | 0.8807 | 0.8332 | 0.8080 |
| Hospitalization for heart failure                                                                                                                      | 64 (10.8)          | 76 (12.9)          | 0.2753 | 610 (26.3)         | 576 (24.9)         | 0.2596 | <0.001 | <0.001 |
| Device therapy, n (%)                                                                                                                                  |                    |                    |        |                    |                    |        |        |        |
| Implantable cardioverter-defibrillator§                                                                                                                | 30 (5.1)           | 32 (5.4)           | 0.7888 | 80 (3.4)           | 84 (3.6)           | 0.7462 | 0.0630 | 0.0454 |
| Cardiac resynchronization**                                                                                                                            | 1 (0.2)            | 3 (0.5)            | 0.3157 | 9 (0.4)            | 11 (0.5)           | 0.6526 | 0.4179 | 0.9138 |
| Other heart failure therapy, n (%)                                                                                                                     |                    |                    |        |                    |                    |        |        |        |
| ACE inhibitor or ARB or ARNI                                                                                                                           | 465 (78.8)         | 462<br>(78.4)      | 0.8750 | 1889 (81.5)        | 1872<br>(80.8)     | 0.5638 | 0.1445 | 0.1991 |
| β-Blocker                                                                                                                                              | 511 (86.6)         | 497<br>(84.4)      | 0.2770 | 2011 (86.7)        | 1999<br>(86.3)     | 0.6590 | 0.9449 | 0.2381 |
| MRA                                                                                                                                                    | 156 (26.4)         | 198<br>(33.6)      | 0.0072 | 924 (39.8)         | 889 (38.4)         | 0.3031 | <0.001 | 0.0333 |
| ARNi                                                                                                                                                   | 14 (2.4)           | 18 (3.1)           | 0.47   | 48 (2.1)           | 49 (2.1)           | 0.91   | 0.6491 | 0.1741 |
| ACE/ARB/ARNI + β-Blocker + MRA                                                                                                                         | 125 (21.2)         | 143<br>(24.3)      | 0.2053 | 660 (28.5)         | 640 (27.6)         | 0.5251 | 0.0004 | 0.1024 |
| <i>Glucose-lowering medication, n (%)</i>                                                                                                              |                    |                    |        |                    |                    |        |        |        |
| Biguanide                                                                                                                                              | 140 (62.5)         | 154<br>(58.6)      | 0.3751 | 618 (51.2)         | 626 (53.5)         | 0.2616 | 0.0018 | 0.1337 |
| Sulfonylurea                                                                                                                                           | 48 (21.4)          | 54 (20.5)          | 0.8086 | 254 (21.0)         | 251 (21.4)         | 0.8077 | 0.8922 | 0.7466 |
| DPP-4 inhibitor                                                                                                                                        | 32 (14.3)          | 35 (13.3)          | 0.7549 | 151 (12.5)         | 163 (13.9)         | 0.3064 | 0.4622 | 0.7950 |
| GLP-1 receptor agonist                                                                                                                                 | 2 (0.9)            | 6 (2.3)            | 0.2296 | 27 (2.2)           | 23 (2.0)           | 0.6451 | 0.1902 | 0.7412 |
| Insulin                                                                                                                                                | 47 (21.0)          | 66 (25.1)          | 0.2839 | 378 (31.3)         | 351 (30.0)         | 0.4860 | 0.0019 | 0.1154 |
| # including NYHA I class (2 patients in Empa group each in the group using and not using diuretics)                                                    |                    |                    |        |                    |                    |        |        |        |
| § includes all the patients with an implantable cardioverter–defibrillator regardless of the presence or absence of cardiac resynchronization therapy. |                    |                    |        |                    |                    |        |        |        |
| ** includes all the patients who were receiving cardiac resynchronization therapy regardless of the presence or absence of a defibrillator.            |                    |                    |        |                    |                    |        |        |        |



**eTable 2.** Change from baseline in estimated glomerular filtration rate slope and physiologic variables (at 52 weeks) in the placebo arm, according to baseline diuretic status and dose

|                                                                      | <b>Adjusted mean change (95% CI)</b> | <b>Difference in means (95% CI)</b> | <b>p-trend<br/>(by dose)</b> | <b>p-value<br/>(no diuretics vs any dose)</b> |
|----------------------------------------------------------------------|--------------------------------------|-------------------------------------|------------------------------|-----------------------------------------------|
| <b>eGFR (CKD-EPI) slope change/yr</b>                                |                                      |                                     |                              |                                               |
| No diuretics                                                         | -2.67 (-3.16, -2.18)                 | Referent                            | 0.5187                       | 0.8732                                        |
| <40 mg                                                               | -2.52 (-2.92, -2.13)                 | 0.14 (-0.49, 0.76)                  |                              |                                               |
| 40 mg                                                                | -2.54 (-2.95, -2.13)                 | 0.12 (-0.52, 0.76)                  |                              |                                               |
| >40 mg                                                               | -2.92 (-3.44, -2.41)                 | -0.26 (-0.99, 0.46)                 |                              |                                               |
| Any dose                                                             | -2.62 (-2.87, -2.37)                 | 0.05 (-0.51, 0.60)                  |                              |                                               |
| <b>Glycated Hb (%) in patients with diabetes, adj. mean (95% CI)</b> |                                      |                                     |                              |                                               |
| No diuretics                                                         | 0.08 (-0.07, 0.22)                   | Referent                            | 0.5556                       | 0.6418                                        |
| <40 mg                                                               | 0.05 (-0.07, 0.17)                   | -0.02 (-0.21, 0.17)                 |                              |                                               |
| 40 mg                                                                | 0.05 (-0.07, 0.16)                   | -0.03 (-0.21, 0.16)                 |                              |                                               |
| >40 mg                                                               | 0.01 (-0.12, 0.14)                   | -0.06 (-0.26, 0.14)                 |                              |                                               |
| Any dose                                                             | 0.04 (-0.03, 0.11)                   | -0.04 (-0.20, 0.13)                 |                              |                                               |
| <b>Hematocrit (%), adj. mean (95% CI)</b>                            |                                      |                                     |                              |                                               |
| No diuretics                                                         | -0.47 (-0.76, -0.19)                 | Referent                            | 0.6493                       | 0.6257                                        |
| <40 mg                                                               | -0.32 (-0.55, -0.08)                 | 0.15 (-0.22, 0.52)                  |                              |                                               |
| 40 mg                                                                | -0.38 (-0.61, -0.15)                 | 0.09 (-0.28, 0.46)                  |                              |                                               |
| >40 mg                                                               | -0.55 (-0.85, -0.25)                 | -0.08 (-0.50, 0.34)                 |                              |                                               |
| Any dose                                                             | -0.39 (-0.54, -0.25)                 | 0.08 (-0.24, 0.40)                  |                              |                                               |
| <b>NT-proBNP, gMean (95% CI)</b>                                     |                                      |                                     |                              |                                               |
| No diuretics                                                         | 0.94 (0.88, 1.00)                    | Referent                            | 0.0011                       | 0.1421                                        |
| <40 mg                                                               | 0.94 (0.89, 0.99)                    | 1.01 (0.92, 1.10)                   |                              |                                               |
| 40 mg                                                                | 0.99 (0.94, 1.04)                    | 1.06 (0.97, 1.16)                   |                              |                                               |
| >40 mg                                                               | 1.08 (1.01, 1.16)                    | 1.16 (1.06, 1.28)                   |                              |                                               |
| Any dose                                                             | 0.99 (0.96, 1.02)                    | 1.06 (0.98, 1.14)                   |                              |                                               |
| <b>Body weight (kg), adj. mean (95% CI)</b>                          |                                      |                                     |                              |                                               |
| No diuretics                                                         | 0.13 (-0.28, 0.53)                   | Referent                            | 0.0188                       | 0.2160                                        |
| <40 mg                                                               | -0.04 (-0.37, 0.30)                  | -0.17 (-0.69, 0.35)                 |                              |                                               |
| 40 mg                                                                | 0.03 (-0.30, 0.36)                   | -0.10 (-0.63, 0.42)                 |                              |                                               |

|                                                           |                      |                      |        |        |
|-----------------------------------------------------------|----------------------|----------------------|--------|--------|
| >40 mg                                                    | -0.69 (-1.12, -0.27) | -0.83 (-1.42, -0.23) |        |        |
| Any dose                                                  | -0.16 (-0.37, 0.04)  | -0.29 (-0.74, 0.17)  |        |        |
| <b>Systolic blood pressure (mmHg), adj. mean (95% CI)</b> |                      |                      |        |        |
| No diuretics                                              | -0.1 (-1.5, 1.3)     | Referent             | 0.1583 | 0.4751 |
| <40 mg                                                    | -0.1 (-1.2, 1.1)     | 0.0 (-1.9, 1.8)      |        |        |
| 40 mg                                                     | -0.9 (-2.1, 0.2)     | -0.9 (-2.7, 0.9)     |        |        |
| >40 mg                                                    | -1.2 (-2.7, 0.3)     | -1.2 (-3.3, 0.9)     |        |        |
| Any dose                                                  | -0.7 (-1.4, 0.0)     | -0.6 (-2.2, 1.0)     |        |        |
| <b>Uric acid (mg/dL), adj. Mean (95% CI)</b>              |                      |                      |        |        |
| No diuretics                                              | -0.19 (-0.32, -0.06) | Referent             | 0.3844 | 0.1358 |
| <40 mg                                                    | -0.07 (-0.17, 0.03)  | 0.12 (-0.04, 0.28)   |        |        |
| 40 mg                                                     | -0.09 (-0.19, 0.02)  | 0.10 (-0.06, 0.27)   |        |        |
| >40 mg                                                    | -0.09 (-0.22, 0.05)  | 0.10 (-0.09, 0.29)   |        |        |
| Any dose                                                  | -0.08 (-0.14, -0.02) | 0.11 (-0.03, 0.25)   |        |        |

**eTable 3.** Effect of empagliflozin versus placebo on eGFR slope and physiologic outcomes (at 52 weeks), according to baseline diuretic therapy

|                                                               | Placebo                       | Empagliflozin                 |                              |                   | P-value                    |
|---------------------------------------------------------------|-------------------------------|-------------------------------|------------------------------|-------------------|----------------------------|
|                                                               | Adjusted mean change (95% CI) | Adjusted mean change (95% CI) | Difference in means (95% CI) | P-value (by dose) | (no diuretics vs any dose) |
| eGFR (CKD-EPI) slope change/yr                                |                               |                               |                              |                   |                            |
| All patients                                                  | -2.62 (-2.83, -2.41)          | -1.25 (-1.47, -1.04)          | 1.36 (1.06, 1.66)            | 0.8749            | 0.6168                     |
| No diuretics                                                  | -2.95 (-3.42, -2.48)          | -1.73 (-2.20, -1.26)          | 1.22 (0.55, 1.89)            |                   |                            |
| <40 mg                                                        | -2.61 (-2.99, -2.23)          | -1.11 (-1.50, -0.72)          | 1.50 (0.96, 2.05)            |                   |                            |
| 40 mg                                                         | -2.48 (-2.88, -2.08)          | -1.15 (-1.54, -0.76)          | 1.33 (0.77, 1.89)            |                   |                            |
| >40 mg                                                        | -2.58 (-3.08, -2.08)          | -1.20 (-1.70, -0.69)          | 1.38 (0.67, 2.10)            |                   |                            |
| Any dose                                                      | -2.55 (-2.79, -2.31)          | -1.14 (-1.38, -0.90)          | 1.41 (1.07, 1.75)            |                   |                            |
| Glycated Hb (%) in patients with diabetes, adj. mean (95% CI) |                               |                               |                              |                   |                            |
| All patients                                                  | 0.03 (-0.01, 0.08)            | -0.16 (-0.20, -0.12)          | -0.19 (-0.25, -0.14)         | 0.0399            | 0.3414                     |
| No diuretics                                                  | 0.11 (-0.02, 0.25)            | -0.17 (-0.32, -0.02)          | -0.28 (-0.48, -0.08)         |                   |                            |
| <40 mg                                                        | 0.08 (-0.02, 0.19)            | -0.17 (-0.28, -0.07)          | -0.25 (-0.40, -0.10)         |                   |                            |
| 40 mg                                                         | -0.00 (-0.11, 0.10)           | -0.22 (-0.32, -0.12)          | -0.22 (-0.36, -0.07)         |                   |                            |
| >40 mg                                                        | -0.06 (-0.18, 0.06)           | -0.09 (-0.21, 0.03)           | -0.03 (-0.20, 0.14)          |                   |                            |
| Any dose                                                      | 0.01 (-0.05, 0.07)            | -0.17 (-0.23, -0.10)          | -0.18 (-0.27, -0.09)         |                   |                            |
| Hematocrit (%), adj. mean (95% CI)                            |                               |                               |                              |                   |                            |
| All patients                                                  | -0.41 (-0.54, -0.28)          | 1.94 (1.81, 2.08)             | 2.36 (2.17, 2.54)            | 0.0605            | 0.4132                     |
| No diuretics                                                  | -0.61 (-0.90, -0.31)          | 1.90 (1.60, 2.20)             | 2.51 (2.09, 2.92)            |                   |                            |



|                                                    |                      |                      |                      |        |        |
|----------------------------------------------------|----------------------|----------------------|----------------------|--------|--------|
| <40 mg                                             | -0.34 (-0.58, -0.09) | 2.24 (1.99, 2.48)    | 2.57 (2.23, 2.92)    |        |        |
| 40 mg                                              | -0.32 (-0.56, -0.07) | 1.89 (1.65, 2.14)    | 2.21 (1.86, 2.56)    |        |        |
| >40 mg                                             | -0.38 (-0.69, -0.07) | 1.68 (1.38, 1.98)    | 2.06 (1.63, 2.50)    |        |        |
| Any dose                                           | -0.34 (-0.49, -0.19) | 1.97 (1.82, 2.12)    | 2.31 (2.10, 2.52)    |        |        |
| NT-proBNP (pg/mL), gMean ratio (95% CI)            |                      |                      |                      |        |        |
| All patients                                       | 0.98 (0.95, 1.01)    | 0.93 (0.90, 0.95)    | 0.95 (0.91, 0.99)    | 0.7628 | 0.4041 |
| No diuretics                                       | 0.96 (0.90, 1.02)    | 0.87 (0.82, 0.93)    | 0.91 (0.83, 1.00)    |        |        |
| <40 mg                                             | 0.94 (0.90, 0.99)    | 0.92 (0.87, 0.97)    | 0.98 (0.91, 1.05)    |        |        |
| 40 mg                                              | 0.97 (0.92, 1.02)    | 0.94 (0.89, 0.99)    | 0.96 (0.90, 1.04)    |        |        |
| >40 mg                                             | 1.06 (0.99, 1.13)    | 0.95 (0.89, 1.01)    | 0.90 (0.82, 0.98)    |        |        |
| Any dose                                           | 0.98 (0.95, 1.01)    | 0.93 (0.90, 0.96)    | 0.95 (0.91, 1.00)    |        |        |
| Body weight (kg), adj. mean (95% CI)               |                      |                      |                      |        |        |
| All patients                                       | -0.11 (-0.29, 0.08)  | -1.39 (-1.57, -1.21) | -1.28 (-1.54, -1.03) | 0.0014 | 0.1040 |
| No diuretics                                       | 0.25 (-0.15, 0.66)   | -1.47 (-1.88, -1.06) | -1.72 (-2.30, -1.15) |        |        |
| <40 mg                                             | -0.01 (-0.35, 0.32)  | -1.52 (-1.85, -1.18) | -1.50 (-1.98, -1.03) |        |        |
| 40 mg                                              | 0.01 (-0.32, 0.35)   | -1.45 (-1.79, -1.12) | -1.46 (-1.94, -0.99) |        |        |
| >40 mg                                             | -0.77 (-1.19, -0.34) | -1.03 (-1.45, -0.61) | -0.26 (-0.85, 0.34)  |        |        |
| Any dose                                           | -0.18 (-0.39, 0.02)  | -1.37 (-1.58, -1.16) | -1.19 (-1.48, -0.90) |        |        |
| Systolic blood pressure (mmHg), adj. mean (95% CI) |                      |                      |                      |        |        |
| All patients                                       | -0.6 (-1.2, 0.0)     | -1.8 (-2.4, -1.2)    | -1.2 (-2.1, -0.3)    | 0.2872 | 0.5805 |
| No diuretics                                       | -0.3 (-1.7, 1.1)     | -1.9 (-3.3, -0.6)    | -1.7 (-3.6, 0.3)     |        |        |

|                                       |                      |                      |                      |        |        |
|---------------------------------------|----------------------|----------------------|----------------------|--------|--------|
| <40 mg                                | -0.4 (-1.6, 0.7)     | -2.1 (-3.2, -0.9)    | -1.6 (-3.3, 0.0)     |        |        |
| 40 mg                                 | -0.9 (-2.0, 0.3)     | -1.8 (-2.9, -0.6)    | -0.9 (-2.5, 0.7)     |        |        |
| >40 mg                                | -0.6 (-2.1, 0.8)     | -1.0 (-2.4, 0.4)     | -0.4 (-2.4, 1.6)     |        |        |
| Any dose                              | -0.6 (-1.3, 0.1)     | -1.7 (-2.4, -1.0)    | -1.1 (-2.1, -0.1)    |        |        |
| Uric acid (mg/dL), adj. mean (95% CI) |                      |                      |                      |        |        |
| All patients                          | -0.10 (-0.15, -0.04) | -0.90 (-0.95, -0.84) | -0.80 (-0.88, -0.72) | 0.1401 | 0.8597 |
| No diuretics                          | 0.13 (0.01, 0.26)    | -0.65 (-0.78, -0.53) | -0.79 (-0.96, -0.62) |        |        |
| <40 mg                                | 0.05 (-0.05, 0.15)   | -0.88 (-0.98, -0.78) | -0.93 (-1.07, -0.79) |        |        |
| 40 mg                                 | -0.18 (-0.28, -0.07) | -0.95 (-1.05, -0.85) | -0.77 (-0.92, -0.63) |        |        |
| >40 mg                                | -0.46 (-0.59, -0.33) | -1.12 (-1.25, -1.00) | -0.66 (-0.84, -0.48) |        |        |
| Any dose                              | -0.16 (-0.22, -0.10) | -0.97 (-1.03, -0.91) | -0.81 (-0.89, -0.72) |        |        |

**eTable 4.** Adverse effects in the empagliflozin versus placebo arm according to baseline diuretic use (shown up to 7 days after discontinuation of study medication)

|                                                                             | Placebo  |                          | Empagliflozin |                          | Adjusted HR<br>(95% CI) | p-trend<br>test<br>(by<br>dose) | p-value<br>(no diuretics<br>vs any dose) |
|-----------------------------------------------------------------------------|----------|--------------------------|---------------|--------------------------|-------------------------|---------------------------------|------------------------------------------|
|                                                                             | n/N      | Events/100<br>patient-yr | n/N           | Events/100<br>patient-yr |                         |                                 |                                          |
| Adverse events leading to treatment discontinuation<br>(incl. fatal events) |          |                          |               |                          |                         |                                 |                                          |
| No diuretics                                                                | 87/589   | 7.9                      | 96/590        | 8.7                      | 1.10 (0.82,<br>1.47)    | 0.91                            | 0.62                                     |
| <40 mg                                                                      | 134/864  | 8.0                      | 129/860       | 7.8                      | 0.98 (0.77,<br>1.24)    |                                 |                                          |
| 40 mg                                                                       | 189/889  | 11.8                     | 185/883       | 11.2                     | 0.97 (0.79,<br>1.19)    |                                 |                                          |
| >40 mg                                                                      | 130/562  | 12.6                     | 148/575       | 14.3                     | 1.11 (0.87,<br>1.40)    |                                 |                                          |
| Any dose                                                                    | 453/2315 | 10.5                     | 462/2318      | 10.6                     | 1.02 (0.89,<br>1.16)    |                                 |                                          |
| Volume depletion events                                                     |          |                          |               |                          |                         |                                 |                                          |
| No diuretics                                                                | 43/589   | 4.1                      | 46/590        | 4.3                      | 1.06 (0.70,<br>1.61)    | 0.75                            | 0.32                                     |
| <40 mg                                                                      | 76/864   | 4.7                      | 102/860       | 6.6                      | 1.42 (1.05,<br>1.91)    |                                 |                                          |
| 40 mg                                                                       | 80/889   | 5.2                      | 104/883       | 6.7                      | 1.31 (0.98,<br>1.75)    |                                 |                                          |
| >40 mg                                                                      | 75/562   | 7.7                      | 95/575        | 10.1                     | 1.27 (0.94,<br>1.73)    |                                 |                                          |
| Any dose                                                                    | 231/2315 | 5.6                      | 301/2318      | 7.5                      | 1.34 (1.13,<br>1.59)    |                                 |                                          |
| Acute renal failure                                                         |          |                          |               |                          |                         |                                 |                                          |
| No diuretics                                                                | 52/589   | 4.9                      | 40/590        | 3.7                      | 0.79 (0.53,<br>1.20)    | 0.48                            | 0.38                                     |

|              |          |      |          |      |                   |      |      |
|--------------|----------|------|----------|------|-------------------|------|------|
| <40 mg       | 82/864   | 5.1  | 82/860   | 5.2  | 0.99 (0.73, 1.34) |      |      |
| 40 mg        | 127/889  | 8.4  | 113/883  | 7.3  | 0.92 (0.71, 1.18) |      |      |
| >40 mg       | 112/562  | 12.0 | 120/575  | 13.2 | 1.00 (0.77, 1.29) |      |      |
| Any dose     | 321/2315 | 7.9  | 315/2318 | 7.8  | 0.97 (0.83, 1.13) |      |      |
| Hyperkalemia |          |      |          |      |                   |      |      |
| No diuretics | 43/589   | 4.1  | 39/590   | 3.7  | 0.96 (0.62, 1.48) | 0.84 | 0.49 |
| <40 mg       | 49/864   | 3.0  | 40/860   | 2.5  | 0.78 (0.51, 1.19) |      |      |
| 40 mg        | 78/889   | 5.2  | 61/883   | 3.8  | 0.78 (0.56, 1.09) |      |      |
| >40 mg       | 43/562   | 4.4  | 43/575   | 4.3  | 0.90 (0.59, 1.38) |      |      |
| Any dose     | 170/2315 | 4.1  | 144/2318 | 3.4  | 0.81 (0.65, 1.01) |      |      |

Adverse events are shown up to 7 days after discontinuation of study medication.

**eTable 5.** Frequency of each preferred term grouped under ‘volume depletion’ (shown up to 7 days after discontinuation of study medication)

|                                | Placebo  |                       | Empagliflozin |                       |
|--------------------------------|----------|-----------------------|---------------|-----------------------|
|                                | n/N      | Events/100 patient-yr | n/N           | Events/100 patient-yr |
| <b>Hypotension</b>             |          |                       |               |                       |
| No diuretics                   | 27/589   | 2.50                  | 27/590        | 2.51                  |
| <40 mg                         | 49/864   | 3.00                  | 62/2318       | 3.92                  |
| 40 mg                          | 57/889   | 3.67                  | 69/883        | 4.33                  |
| >40 mg                         | 47/562   | 4.73                  | 66/575        | 6.81                  |
| Any dose                       | 153/2315 | 3.66                  | 197/2318      | 4.75                  |
| <b>Orthostatic hypotension</b> |          |                       |               |                       |
| No diuretics                   | 3/589    | 0.27                  | 1/590         | 0.09                  |
| <40 mg                         | 2/864    | 0.12                  | 6/860         | 0.36                  |
| 40 mg                          | 7/889    | 0.44                  | 6/883         | 0.36                  |
| >40 mg                         | 5/562    | 0.48                  | 5/575         | 0.48                  |
| Any dose                       | 14/2315  | 0.32                  | 17/2318       | 0.39                  |
| <b>Hypovolemic shock</b>       |          |                       |               |                       |
| No diuretics                   | 1/589    | 0.09                  | 0/590         | 0                     |
| <40 mg                         | 1/864    | 0.06                  | 0/860         | 0                     |
| 40 mg                          | 2/889    | 0.12                  | 1/883         | 0.06                  |
| >40 mg                         | 2/562    | 0.19                  | 1/575         | 0.10                  |
| Any dose                       | 5/2315   | 0.12                  | 2/2318        | 0.05                  |
| <b>Circulatory collapse</b>    |          |                       |               |                       |
| No diuretics                   | 0/589    | 0                     | 1/590         | 0.09                  |
| <40 mg                         | 0/864    | 0                     | 0/860         | 0                     |
| 40 mg                          | 0/864    | 0                     | 1/883         | 0.06                  |
| >40 mg                         | 4/562    | 0.39                  | 1/575         | 0.10                  |
| Any dose                       | 4/2315   | 0.09                  | 2/2318        | 0.05                  |
| <b>Syncope</b>                 |          |                       |               |                       |
| No diuretics                   | 8/589    | 0.73                  | 12/590        | 1.09                  |
| <40 mg                         | 18/864   | 1.08                  | 22/860        | 1.34                  |

|              |         |      |         |      |
|--------------|---------|------|---------|------|
| 40 mg        | 12/889  | 0.75 | 16/883  | 0.96 |
| >40 mg       | 11/562  | 1.07 | 13/575  | 1.27 |
| Any dose     | 41/2315 | 0.95 | 51/2318 | 1.18 |
| Presyncope   |         |      |         |      |
| No diuretics | 0/589   | 0    | 2/590   | 0.18 |
| <40 mg       | 3/864   | 0.18 | 3/860   | 0.18 |
| 40 mg        | 2/889   | 0.12 | 4/883   | 0.24 |
| >40 mg       | 2/562   | 0.19 | 4/575   | 0.39 |
| Any dose     | 7/2315  | 0.16 | 11/2318 | 0.25 |
| Dehydration  |         |      |         |      |
| No diuretics | 8/589   | 0.73 | 8/590   | 0.73 |
| <40 mg       | 14/864  | 0.83 | 12/860  | 0.73 |
| 40 mg        | 0/889   | 0    | 0/883   | 0    |
| >40 mg       | 16/562  | 1.57 | 19/575  | 1.85 |
| Any dose     | 39/2315 | 0.91 | 52/2318 | 1.20 |
| Hypovolemia  |         |      |         |      |
| No diuretics | 0/589   | 0    | 1/590   | 0.09 |
| <40 mg       | 0/864   | 0    | 3/860   | 0.18 |
| 40 mg        | 0/889   | 0    | 0/883   | 0    |
| >40 mg       | 3/562   | 0.29 | 0/575   | 0    |
| Any dose     | 4/2315  | 0.09 | 4/2318  | 0.09 |

Adverse events are shown up to 7 days after discontinuation of study medication.

**eFigure 1.** Event rates for primary and secondary outcomes in placebo arm according to baseline diuretic status

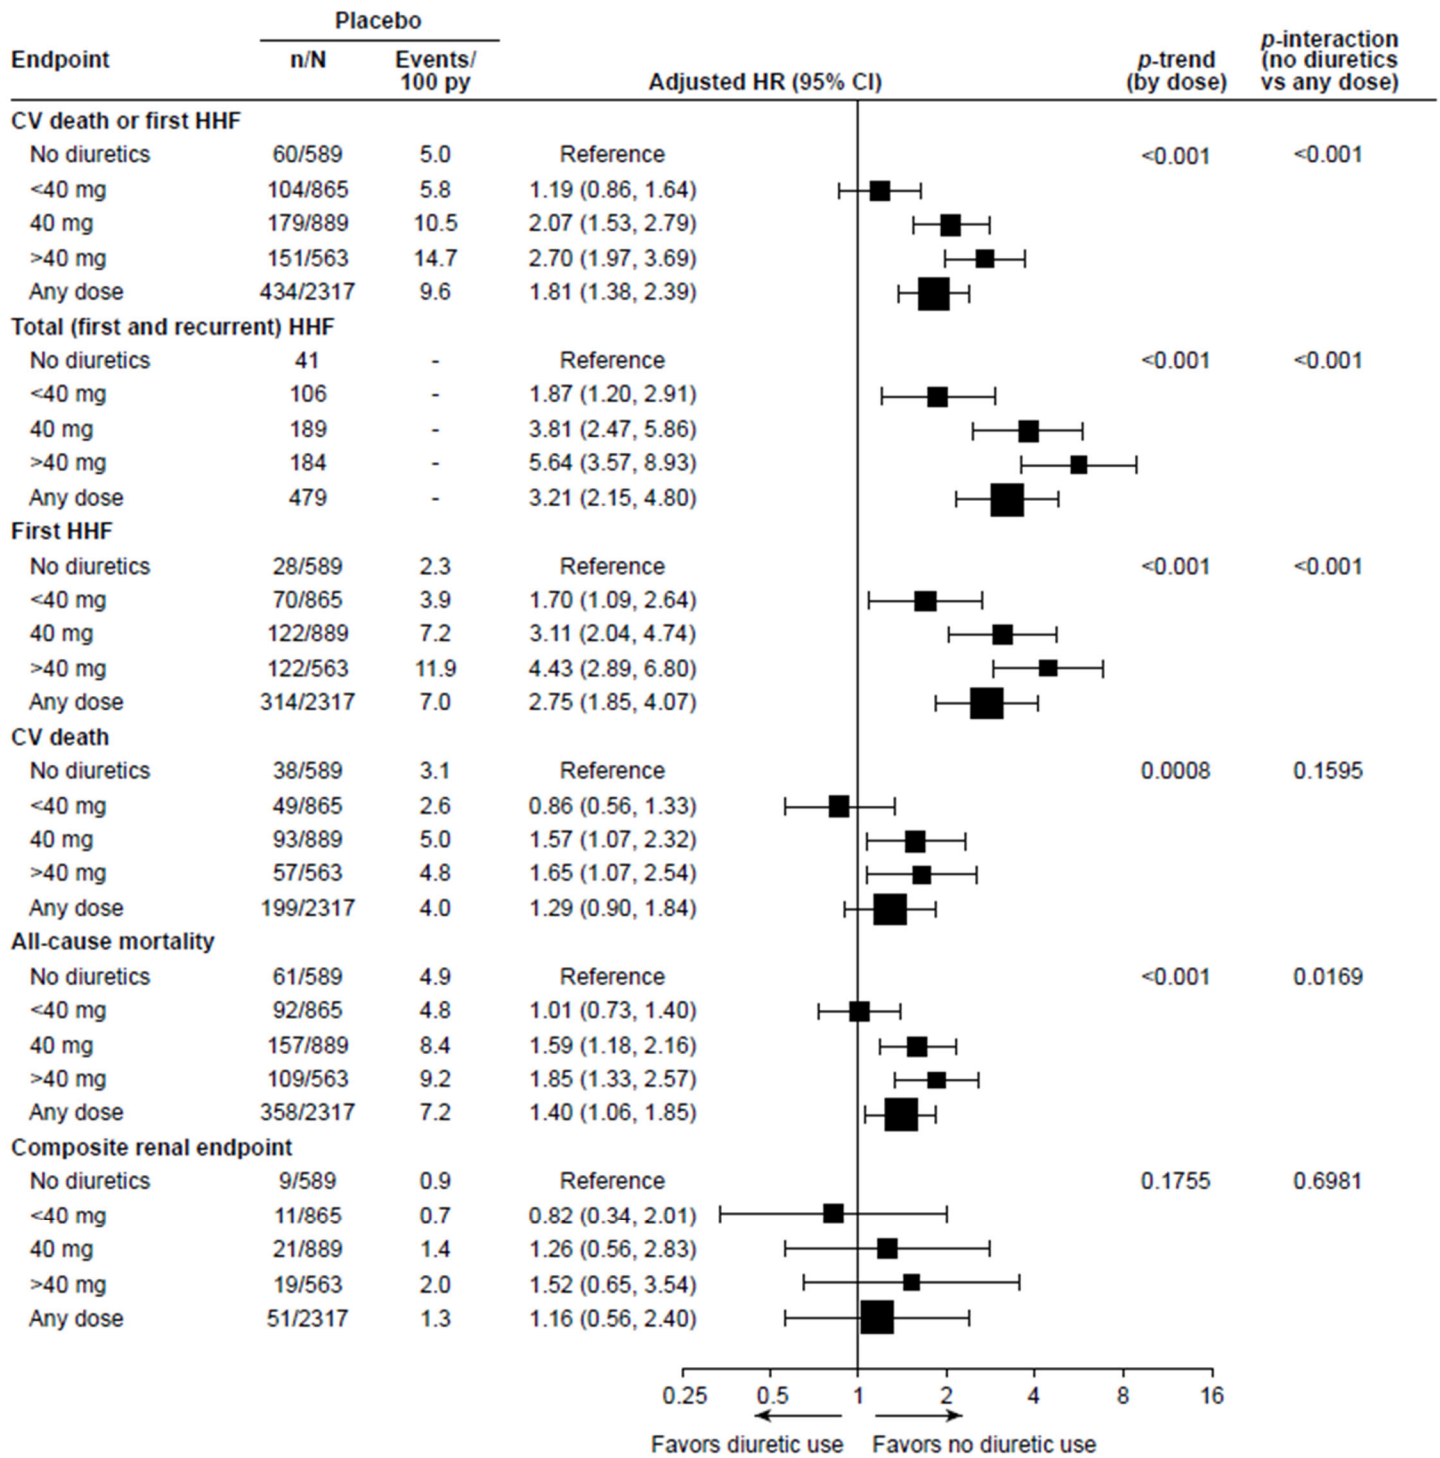

**eFigure 2.** Change in Kansas City Cardiomyopathy Questionnaire subdomain scores KCCQ-CSS (A), KCCQ-TSS (B) and KCCQ-OSS (C) in the placebo arm according to baseline diuretic status and dose

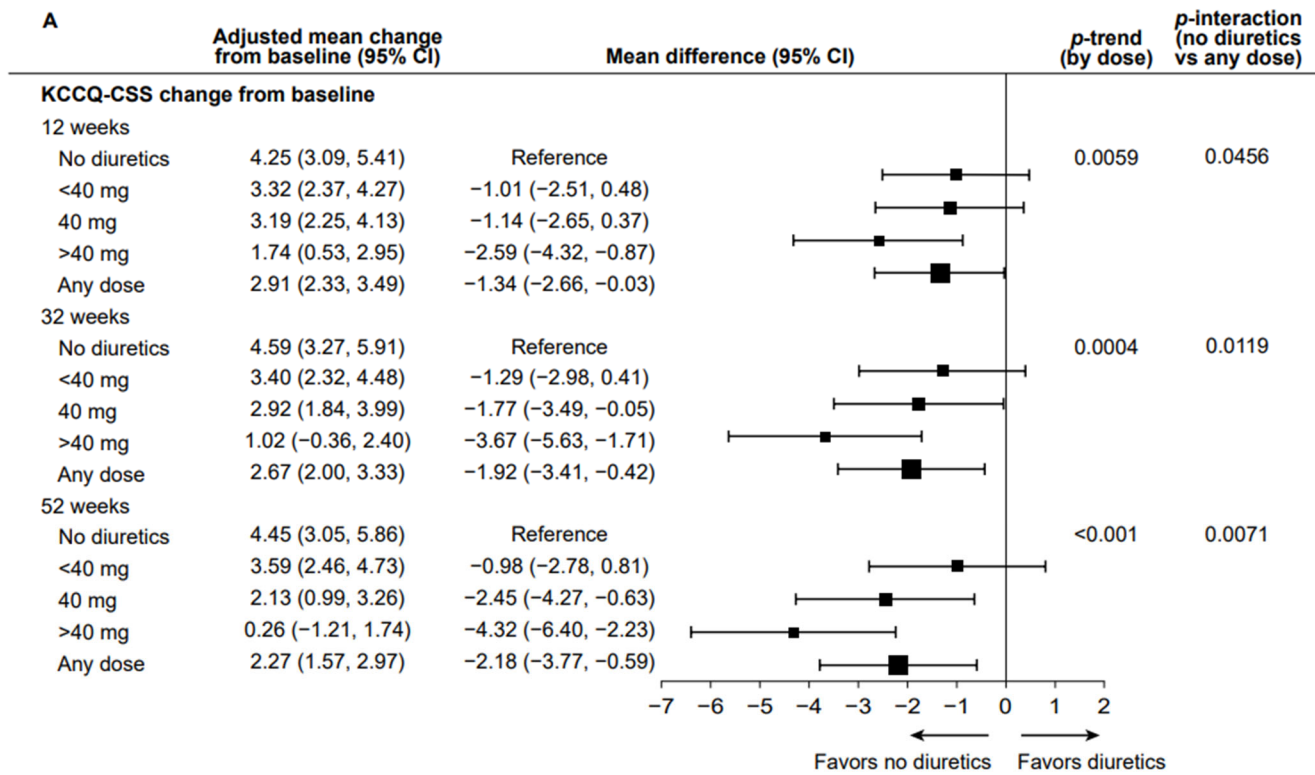



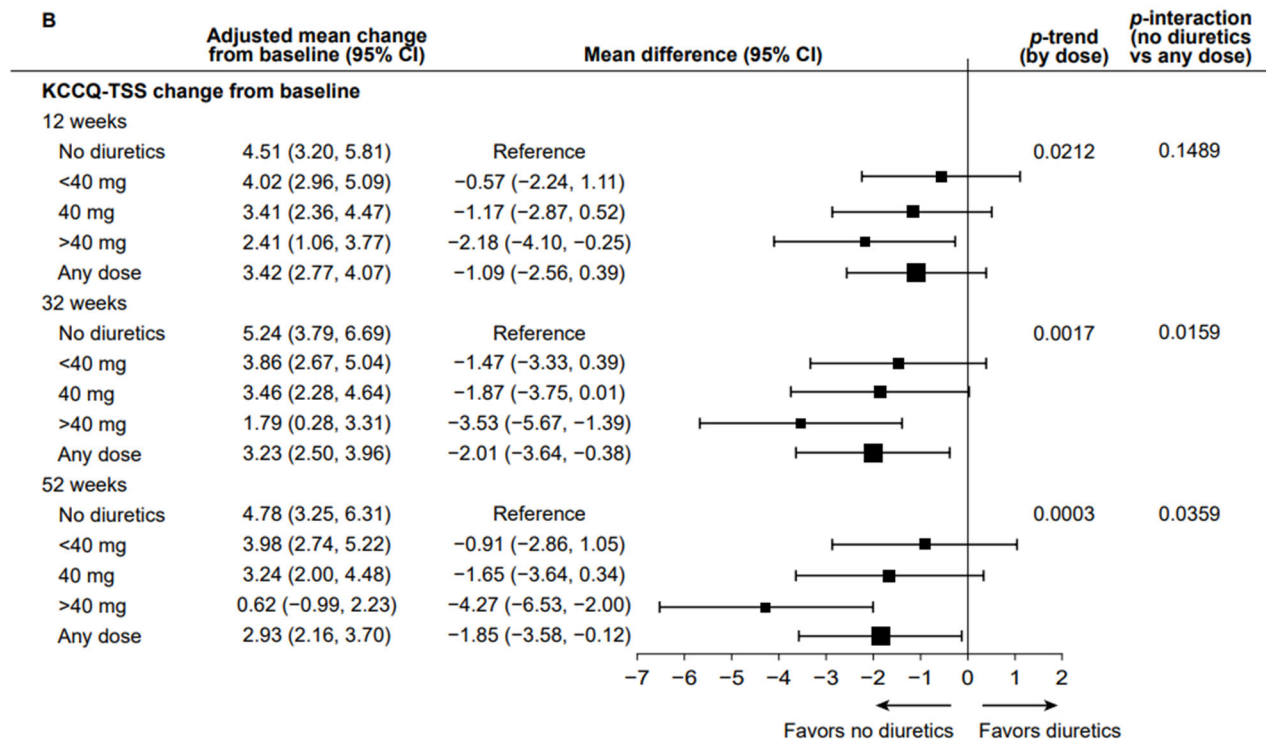

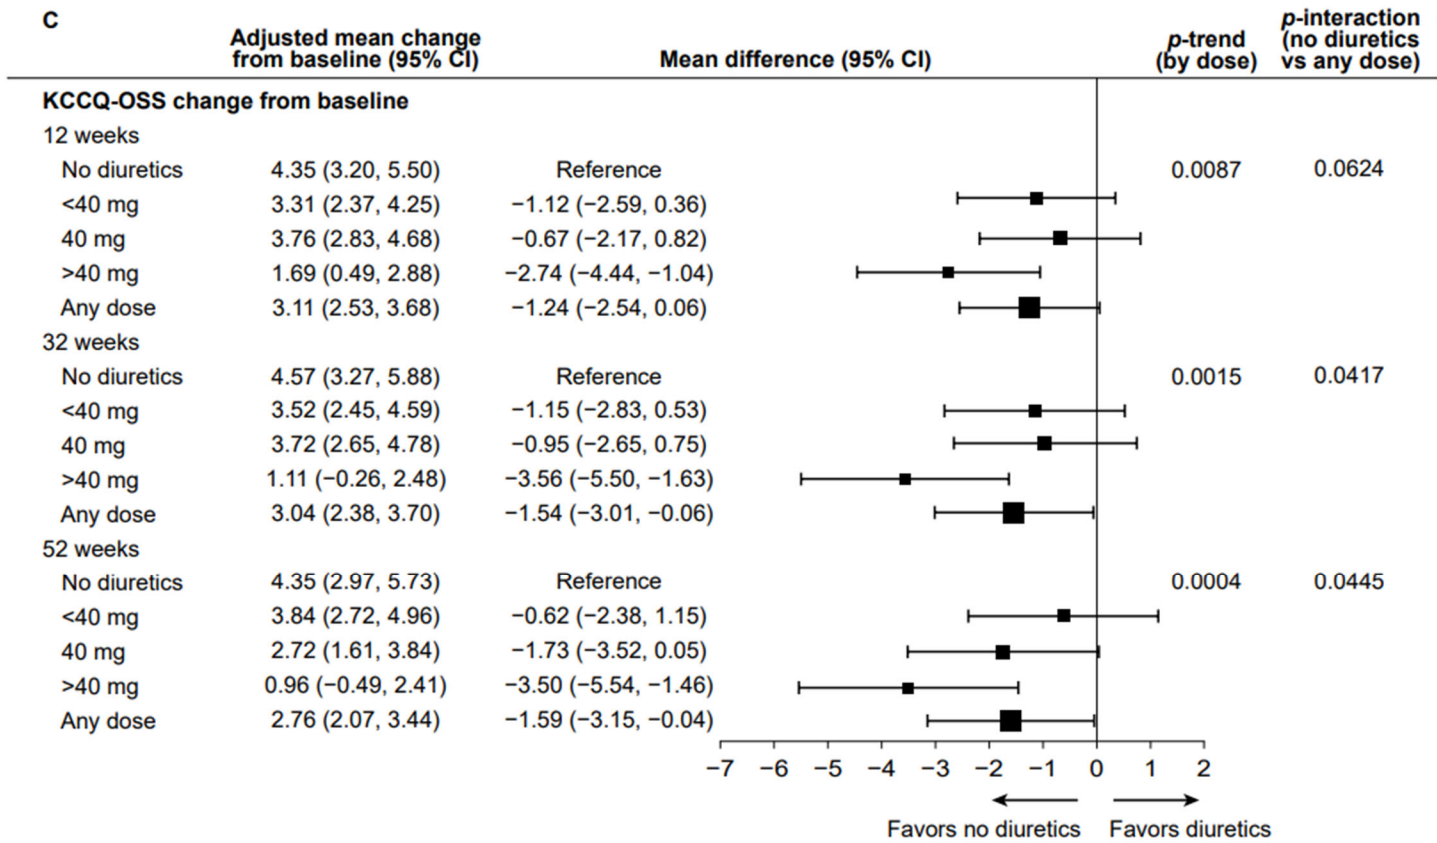

Supplement: jamacardiol-e231090-s002.pdf [file jamacardiol-e231090-s002.pdf]
