# Supplementary material for: Safety and Efficacy of Empagliflozin and Diuretic Use in Patients with Heart Failure and Preserved Ejection Fraction: A Post Hoc Analysis of the EMPEROR-Preserved Trial
Source: PubMed Central journal article supplement — JAMA Cardiol. 2023 May 24;8(7):640–9. doi: 10.1001/jamacardio.2023.1090 (PMC10209829; doi:10.1001/jamacardio.2023.1090), 2023-05-24
Supplement: jamacardiol-e231090-s003.pdf [file jamacardiol-e231090-s003.pdf]

## Data Sharing Statement

Butler. Safety and Efficacy of Empagliflozin and Diuretic Use in Patients with Heart Failure and Preserved Ejection Fraction. *JAMA Cardiol.* Published May 24, 2023.

doi:10.1001/jamacardio.2023.1090

### Data

**Data available:** Yes

**Data types:** Deidentified participant data

**How to access data:** To ensure independent interpretation of clinical study results and enable authors to fulfil their role and obligations under the ICMJE criteria, Boehringer Ingelheim grants all external authors access to relevant clinical study data pertinent to the development of the publication. In adherence with the Boehringer Ingelheim Policy on Transparency and Publication of Clinical Study Data, scientific and medical researchers can request access to clinical study data when it becomes available on Vivli - Center for Global Clinical Research Data (<https://vivli.org/>), and earliest after publication of the primary manuscript in a peer-reviewed journal, regulatory activities are complete and other criteria are met. Please visit <https://www.mystudywindow.com/msw/datasharing> for further information.

**When available:** With publication

### Supporting Documents

**Document types:** None

### Additional Information

**Who can access the data:** Anyone requesting the data.

**Types of analyses:** For any purpose.

**Mechanisms of data availability:** With a signed data access agreement
